# Supplementary material for: Lima1 mediates the pluripotency control of membrane dynamics and cellular metabolism
Source: Springer Nature journal article supplement (doi:10.1038/s41467-022-28139-5), 2022-02-01
Supplement: MOESM1 [file 41467_2022_28139_MOESM1_ESM.pdf]

Supplementary Information

**Lima1 mediates the pluripotency control of membrane dynamics and cellular metabolism**

Duethorn et al

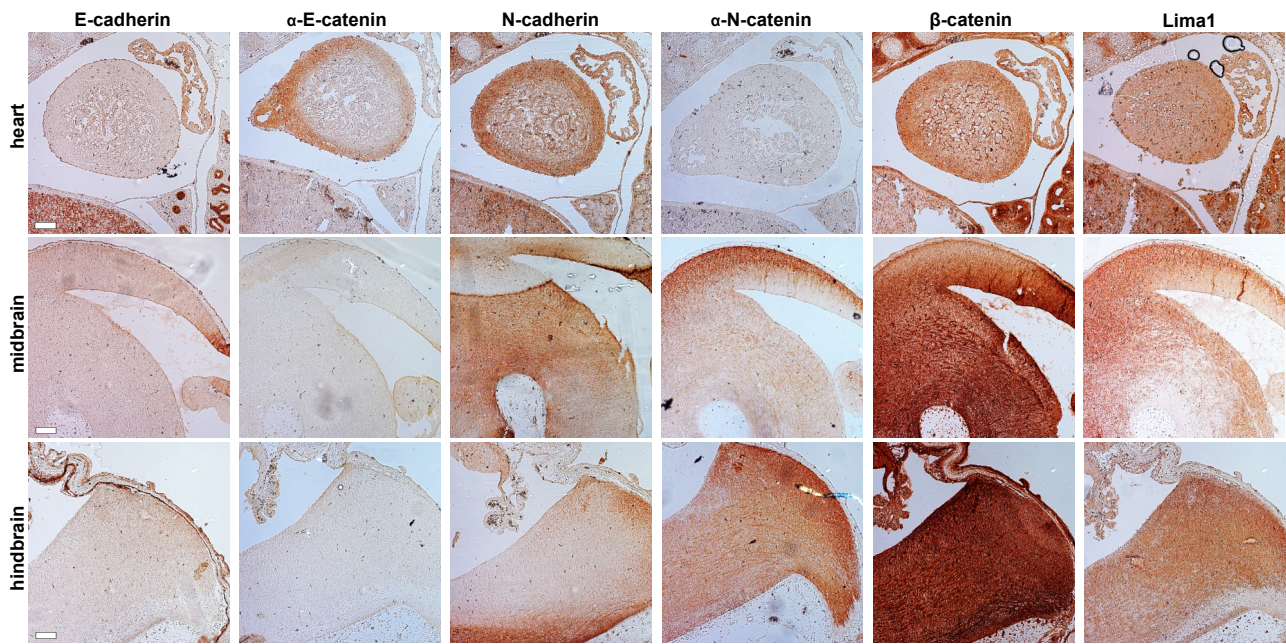

**Figure S1. Lima1 expression in E14.5 embryos.**

Heart and brain regions of E14.5 embryos stained for E-cad,  $\alpha$ -E-cat, N-cad,  $\alpha$ -N-cat,  $\beta$ -cat or Lima1.

Scale bar, 100  $\mu$ m. Experiments were repeated independently at least three times with similar results. Related to Figure 1.

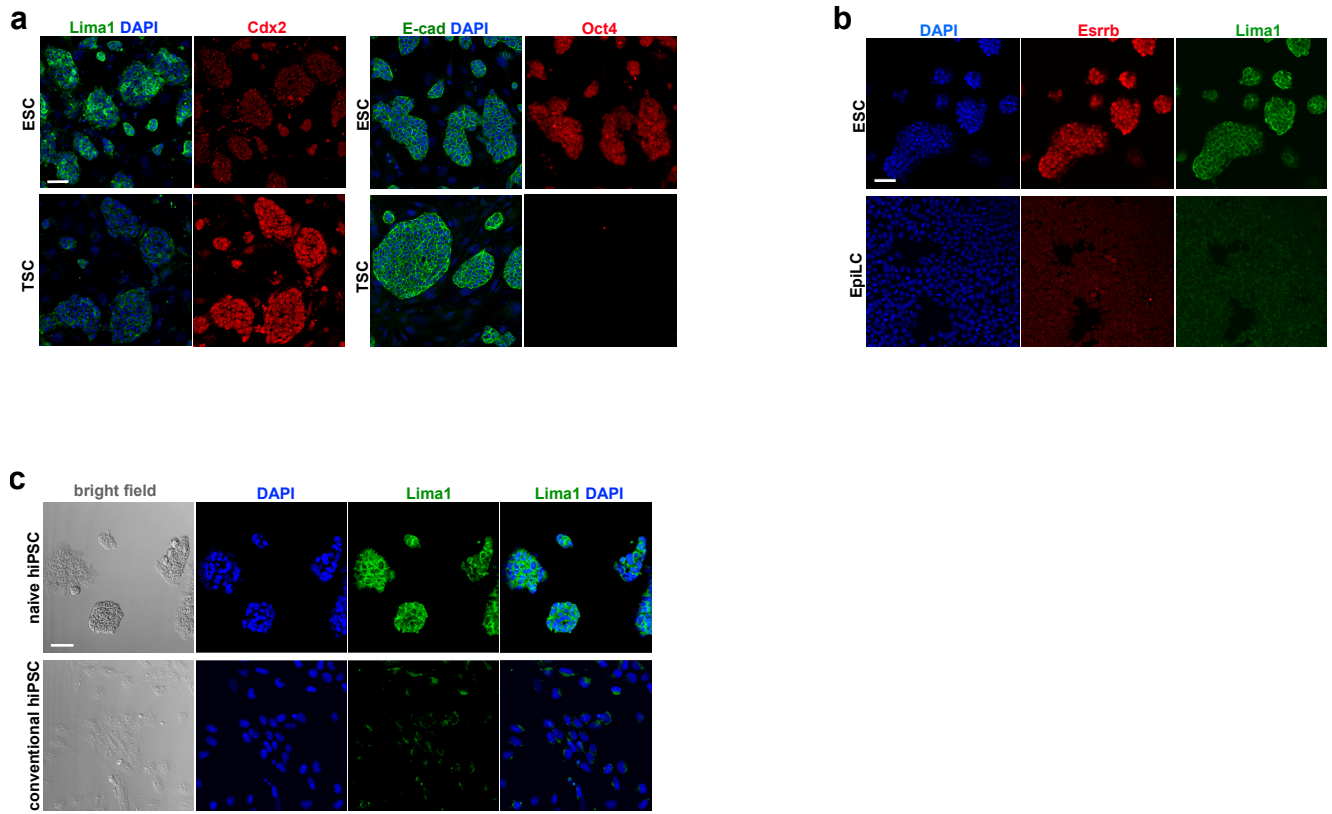

**Figure S2. Lima1 expression in pluripotent stem cells.**

a) ESC and TSC stained for Lima1 and Cdx2 (left panel) or E-cad and Oct4 (right panel).

b) ESC and EpiLC stained for Esrrb and Lima1.

c) Naïve hiPSC and conventional hiPSC stained for Lima1.

Scale bars, (a), (b), (c), 50  $\mu$ m. Experiments were repeated independently at least three times (a) or two times (b, c) with similar results. Related to Figure 2.

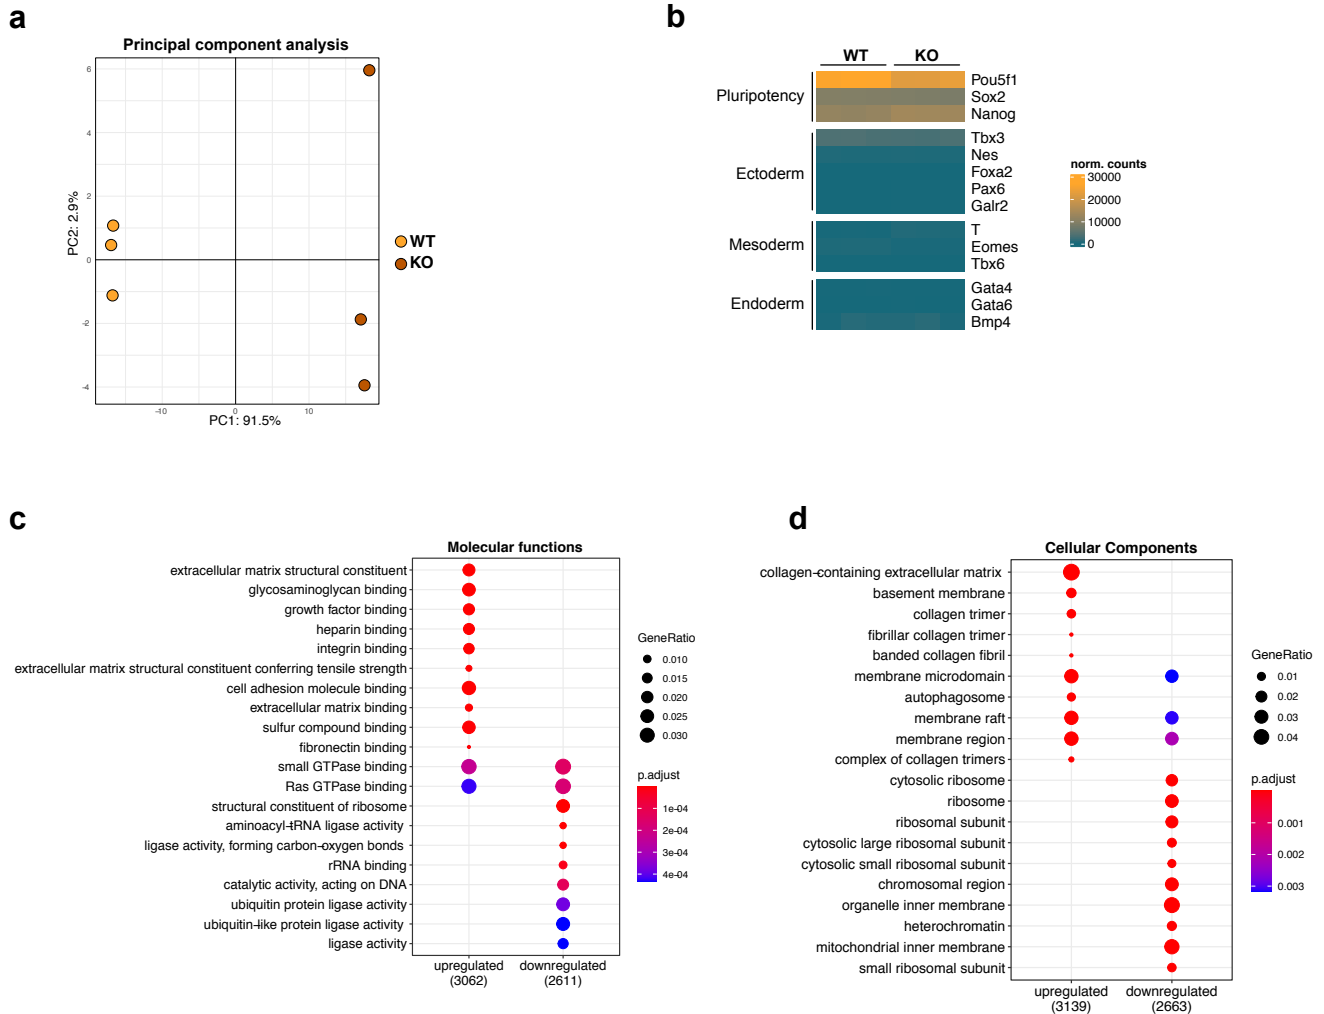

**Figure S3. RNA-seq analysis of Lima1 deletion in ESC.**

- a) Principal component analysis of WT and Lima1 KO ESC transcriptomes.  
b) Expression of pluripotency and lineage differentiation markers in WT and Lima1 KO ESC.  
c) Gene ontology (GO) enrichment analysis "Molecular functions".  
d) Gene ontology (GO) enrichment analysis "Cellular Components".  
Related to Figure 3.

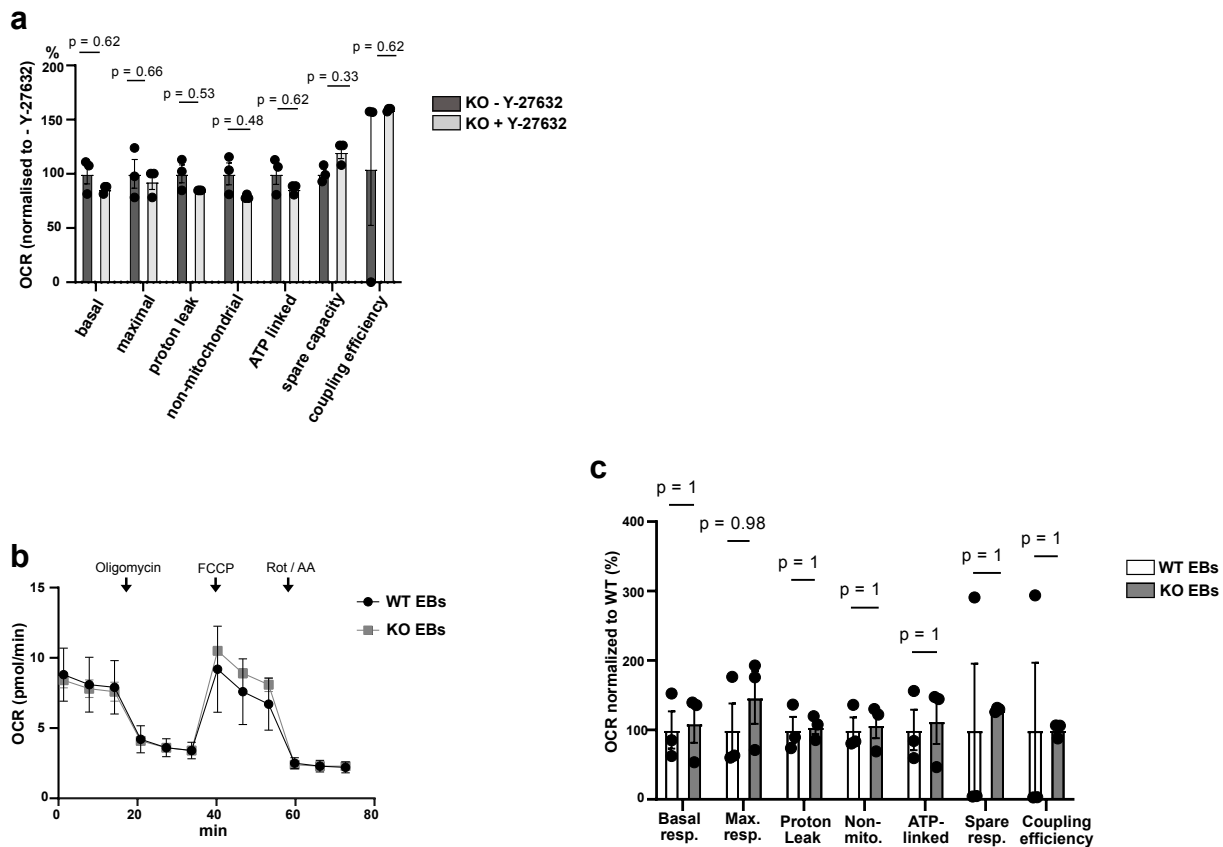

**Figure S4. Seahorse analysis of Lima1 KO ESC and EBs.**

a) Quantification of OCR in Lima1 KO ESC treated or untreated with Y-27632. Data represent mean values  $\pm$  SEM from  $n =$  three independent experiments, with 10 measurements per genotype, unpaired Student's  $t$ -test, 2-sided.

b) OCR measurement in Lima1 KO or WT EBs using the Seahorse mitochondrial stress test assay. FCCP - Carbonyl cyanide-4 (trifluoromethoxy) phenylhydrazone; Rot - Rotenone; AA - Antimycin. Three independent experiments, mean values  $\pm$  SEM.

c) Quantification of the OCR in Lima1 KO or WT EBs. Data represent mean values  $\pm$  SEM with  $n =$  three independent experiments, with 10 measurements per genotype, unpaired Student's  $t$ -test, 2-sided.

Related to Figure 5.

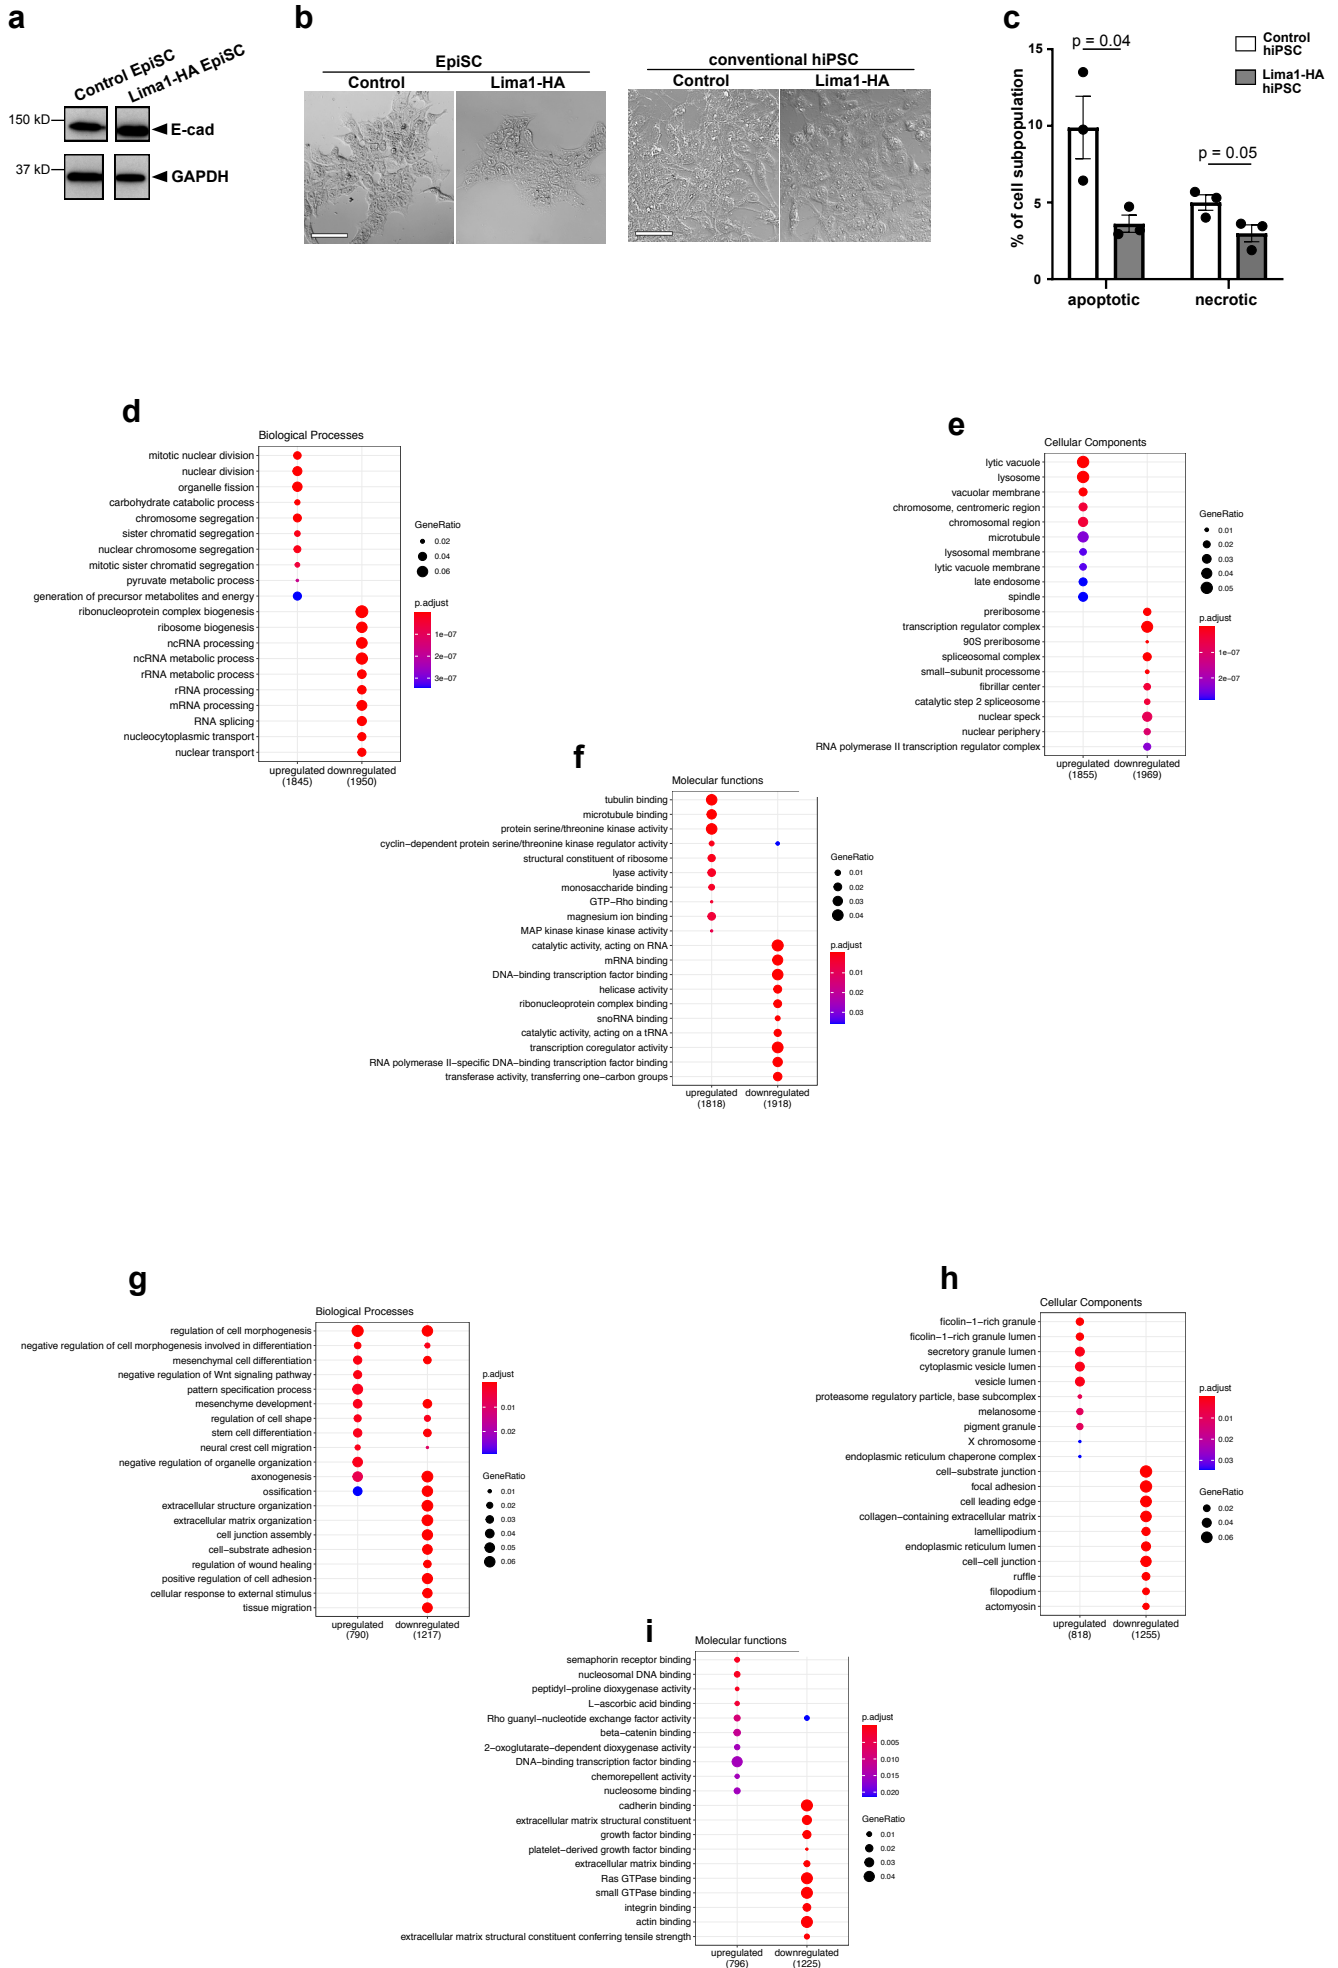

**Figure S5. Ectopic expression of Lima1 in primed pluripotent stem cells.**

- a) Western blot analysis of E-cad expression in control and Lima1-HA EpiSC.
  - b) Control and Lima1-HA EpiSC colonies (left panel), control and Lima1-HA hiPSC colonies (right panel).
  - c) Proportion of apoptotic and necrotic control and Lima1-HA hiPSC. The cells were individualized using accutase and cultured on cell-repellent plates for 2 h at 37 °C. After that, the cell death was determined by annexin V assay in combination with DAPI, three independent experiments, data represent mean  $\pm$  SEM, unpaired Student's t-test, 2-sided.
  - d) GO enrichment analysis "Biological processes" of control and Lima1-HA-expressing EpiSC.
  - e) GO enrichment analysis "Cellular Components" of control and Lima1-HA expressing-EpiSC.
  - f) GO enrichment analysis "Molecular functions" of control and Lima1-HA-expressing EpiSC.
  - g) GO enrichment analysis "Biological processes" of control and Lima1-HA-expressing conventional hiPSC.
  - h) GO enrichment analysis "Cellular Components" of control and Lima1-HA-expressing conventional hiPSC.
  - i) GO enrichment analysis "Molecular functions" of control and Lima1-HA-expressing conventional hiPSC.
- Scale bar, (b), 50  $\mu$ m. Experiments were repeated independently two times (a, b) with similar results.  
Related to Figure 6.

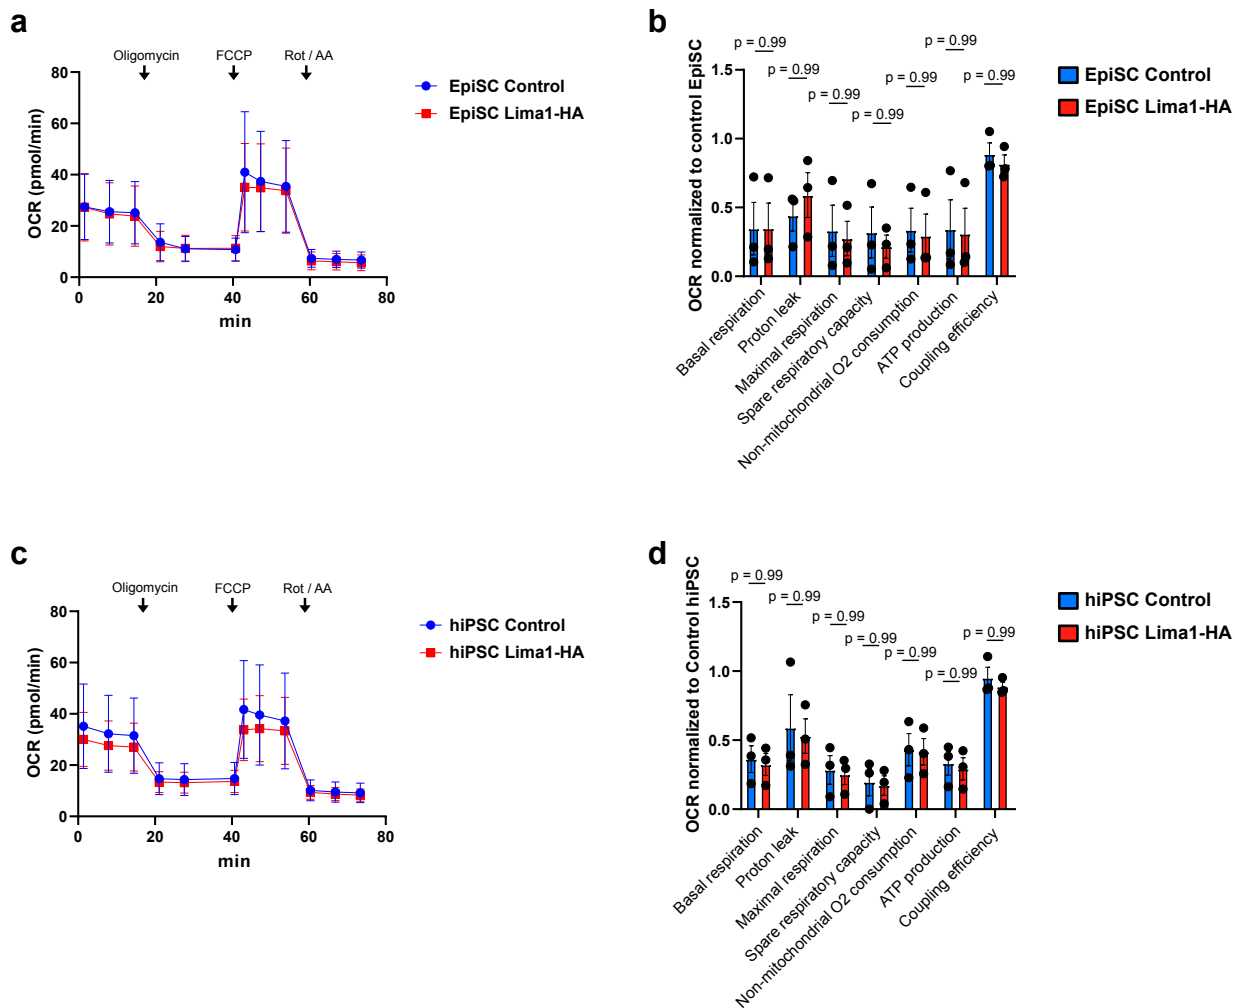

**Figure S6. Seahorse mitochondrial stress test assay in EpiSC and hiPSC.**

a) OCR measurement using the Seahorse mitochondrial stress test assay in control and Lima1-HA EpiSC. FCCP - Carbonyl cyanide-4 (trifluoromethoxy) phenylhydrazone; Rot - Rotenone; AA - Antimycin. Three independent experiments, mean values  $\pm$  SEM.

b) Quantification of the OCR analysis in control and Lima1-HA EpiSC, three independent experiments. Data represent mean  $\pm$  SEM, unpaired Student's t-test, 2-sided.

c) OCR measurement using the Seahorse mitochondrial stress test assay in control and Lima1-HA hiPSC. FCCP - Carbonyl cyanide-4 (trifluoromethoxy) phenylhydrazone; Rot - Rotenone; AA - Antimycin. Three independent experiments, mean values  $\pm$  SEM.

d) Quantification of the OCR analysis in control and Lima1-HA hiPSC, three independent experiments. Data represent mean  $\pm$  SEM, unpaired Student's t-test, 2-sided.

Related to Figure 7.



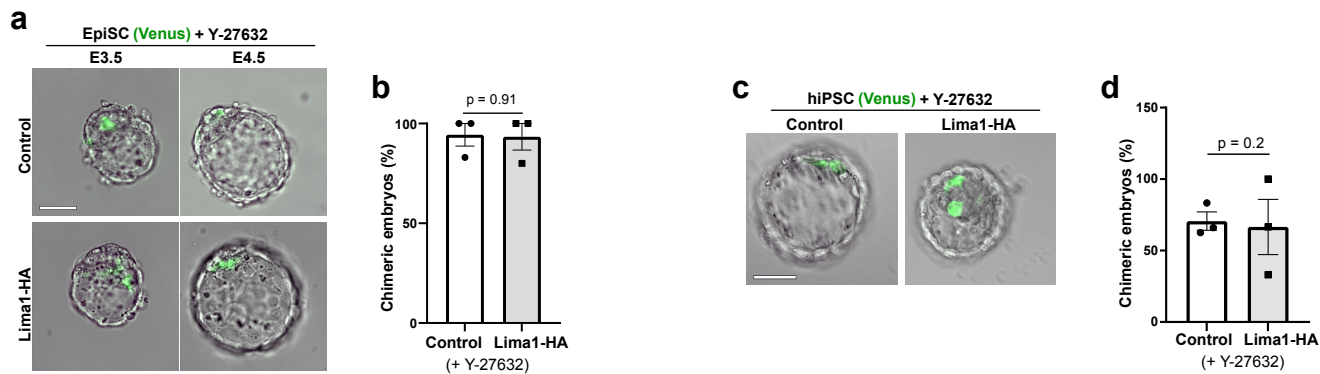

**Figure S7. Engraftment of primed pluripotent cell in mouse pre-implantation embryos upon treatment with Y-27632.**

a) E3.5 and E4.5 chimeric blastocysts generated via morula aggregation using control or Lima1-HA-expressing EpiSC and treated with Y-27632.

b) Quantification of the chimeric blastocysts containing control (embryos) or Lima1-HA-expressing (embryos) EpiSC at E4.5. Data represent mean values  $\pm$  SEM with  $n =$  three independent experiments, unpaired Student's  $t$ -test, 2-sided.

c) Chimeric blastocysts generated via morula aggregation using control or Lima1-HA-expressing conventional hiPSC and treated with Y-27632.

d) Quantification of the chimeric blastocysts containing control (20 embryos) or Lima1-HA-expressing (14 embryos) conventional hiPSC at E4.5. Data represent mean values  $\pm$  SEM with  $n =$  three independent experiments, unpaired Student's  $t$ -test, 2-sided.

Scale bars, (a), (c), 20  $\mu$ m. Related to Figure 8.

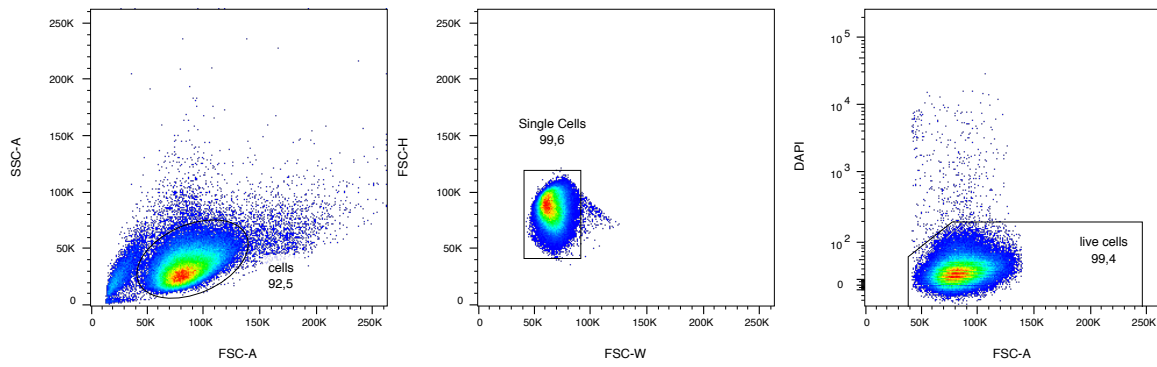

**Figure S8. FACS gating.**

Single viable cells were selected based on FSC- and SSC-gating. DAPI was used to select the live cells.

**FIG 2A**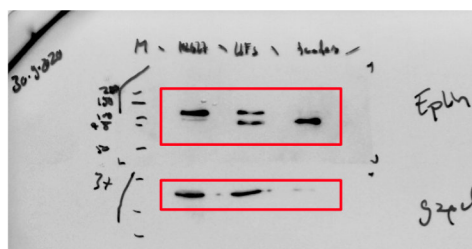**FIG 2D**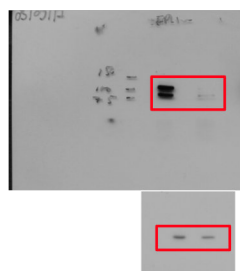**FIG 2E**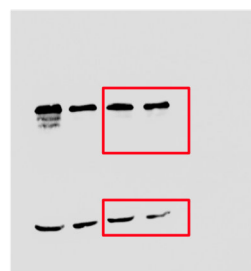**FIG 2H**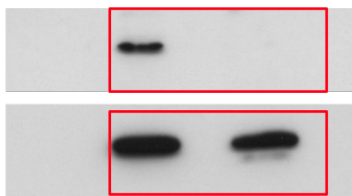**FIG 2i**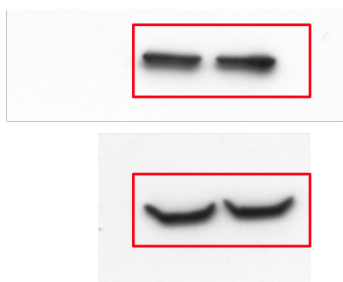**FIG 2J**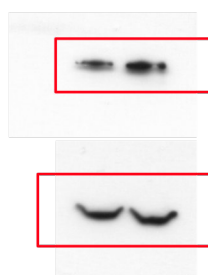**FIG 3B**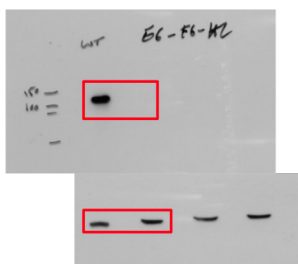**FIG 3I**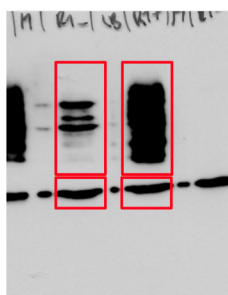**FIG 6B**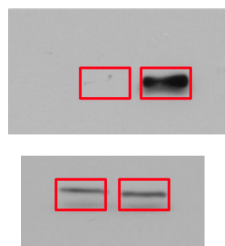**FIG 6D**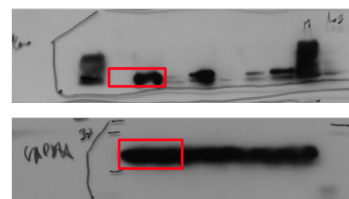**FIG 7D**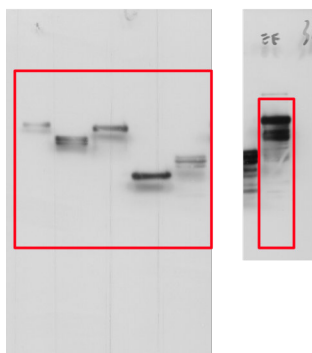**FIG S5A**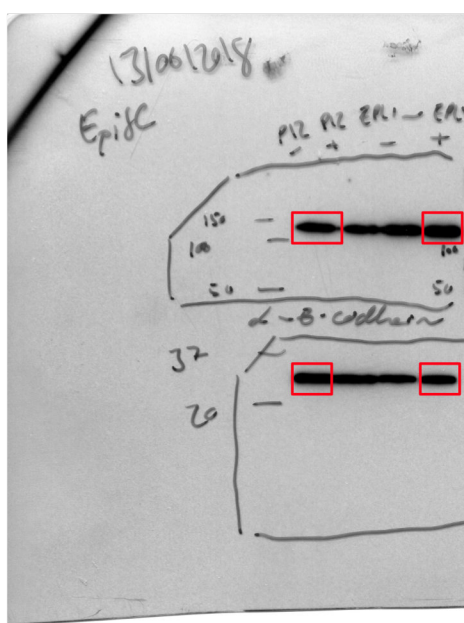

**Figure S9. Scans of the immunoblots used in this study.**  
Red squares indicate the area of the blots used in the figures.

**Table S1. Publicly available ChIP-seq datasets used in this study.**

| Reference          | 27           | 28         | 29                   | 30                   | 31           | 32                                                                         | 33                                     | 34            | 35                           |
|--------------------|--------------|------------|----------------------|----------------------|--------------|----------------------------------------------------------------------------|----------------------------------------|---------------|------------------------------|
| Factor             | Oct4         | Nr0b1      | Klf4                 | ATAC-seq             | Polr2a       | Sox2                                                                       | Sall4                                  | B-catenin     | Nanog, Tcf3                  |
| Culture conditions | N2B27 2i/LIF | Serum /LIF | Serum /LIF + feeders | Serum /LIF + feeders | N2B27 2i/LIF | Serum /LIF + feeders (feeders were removed before performing the ChIP-seq) | 1 % Serum + 10 % KSR (gelatine coated) | Serum /2i/LIF | Serum /LIF (gelatine coated) |

**Table S2. Primary and secondary antibodies used in this study.**

| Description                                           | Manufacturer           | Cat. Number   | Application and dilution                  |
|-------------------------------------------------------|------------------------|---------------|-------------------------------------------|
| <b>Primary antibodies</b>                             |                        |               |                                           |
| b-actin                                               | Sigma                  | A5316         | ICC (1:200)                               |
| a-E-catenin                                           | Cell Signaling         | 3236S         | ICC (1:200), WB (1:1000)                  |
| a-E-catenin                                           | Thermo                 | 13-9700       | ICC (1:200)                               |
| a-N-catenin                                           | Cell Signaling         | CD664         | ICC (1:100)                               |
| b-catenin                                             | BD Biosciences         | 610154        | ICC (1:100), WB (1:1000)                  |
| Biotin antibody agarose                               | ImmuneChem             | ICP0615       | Pull-down (100 µg per 1 mg dried peptide) |
| Cdx2                                                  | Biogenex               | MU392A-UC     | ICC (1:200)                               |
| E-cadherin                                            | BD Biosciences         | 610182        | ICC (1:200), WB (1:1000)                  |
| Eomes/Tbr2                                            | Abcam                  | AB23345       | ICC (1:200)                               |
| Epln                                                  | Proteintech            | 16639-1-AP    | WB (1:500)                                |
| Epln                                                  | Bethyl                 | A300-103A-M   | ICC (1:100), WB (1:1000)                  |
| Epln                                                  | Abe and Takeshi, 2008  | <sup>7</sup>  | ICC (1:200)                               |
| Esrrb                                                 | R&D                    | PP-H6705-00   | ICC (1:200)                               |
| Gapdh                                                 | Cell Signaling         | 5174S         | WB (1:2000)                               |
| Gata3                                                 | Cell Signaling         | 5852S         | ICC (1:200)                               |
| GFP                                                   | R&D                    | AF4240        | ICC (1:200)                               |
| HA-tag                                                | Cell Signaling         | 3724S         | ICC (1:500), WB (1:1000)                  |
| Nanog                                                 | Abcam                  | ab80892       | ICC (1:200)                               |
| N-cadherin                                            | BD Biosciences         | 610920        | ICC (1:100)                               |
| Oct4                                                  | Santa Cruz             | sc-5279       | ICC (1:200)                               |
| Oct4                                                  | Cell Signaling         | 83932S        | ICC (1:200)                               |
| RFP                                                   | Biomol                 | 600-401-379   | ICC (1:200)                               |
| Sox2                                                  | Calbiochem             | 246510        | ICC (1:200)                               |
| Sox2                                                  | Cell Signaling         | 23064S        | ICC (1:200)                               |
| Phospho-ERM                                           | Cell Signaling         | 3726S         | ICC (1:200)                               |
| Podocalyxin                                           | R&D                    | MAB1556       | ICC (1:100)                               |
| Troma-1                                               | Kemler et al, 1981     | <sup>92</sup> | ICC (1:200)                               |
| <b>Secondary Antibodies</b>                           |                        |               |                                           |
| Peroxidase AffiniPure Goat Anti-Mouse IgG + IgM (H+L) | Jackson ImmunoResearch | AB_2338451    | WB (1:2000)                               |
| Phalloidin AF647                                      | Cell Signaling         | 8940S         | ICC (1:200)                               |
| Pierce High Sensitivity Streptavidin-HRP              | Thermo                 | 21130         | WB (1:30000)                              |
| Rabbit IgG HRP Linked                                 | GE Healthcare          | NA934         | WB (1:20000)                              |
| Secondary Donkey anti-mouse AF 488                    | Invitrogen             | A-21202       | ICC (1:200)                               |
| Secondary Donkey anti-mouse AF 594                    | Invitrogen             | A-21203       | ICC (1:200)                               |
| Secondary Donkey anti-mouse AF 647                    | Invitrogen             | A-31571       | ICC (1:200)                               |
| Secondary Donkey anti-goat AF 488                     | Invitrogen             | A-11055       | ICC (1:200)                               |
| Secondary Donkey anti-rabbit AF 488                   | Invitrogen             | A-21206       | ICC (1:200)                               |
| Secondary Donkey anti-rabbit AF 594                   | Invitrogen             | A-21207       | ICC (1:200)                               |
| Secondary Donkey anti-rat AF 647                      | Invitrogen             | A21247        | ICC (1:200)                               |
